# Supplementary material for: Establishment and immune phenotyping of patient-derived glioblastoma models in humanized mice
Source: PubMed Central journal article supplement (PMC10808686; doi:10.3389/fimmu.2023.1324618), 2024-01-11

# Supp. Figure 1

**A**

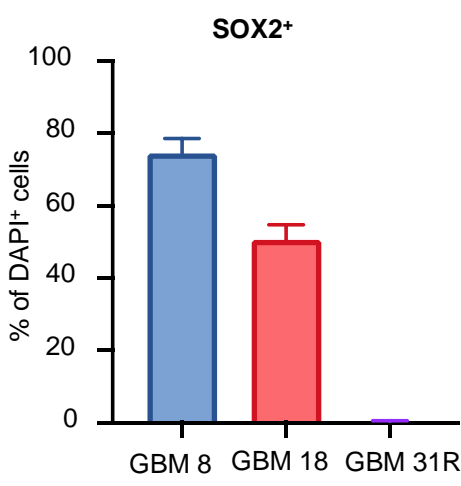

**B**

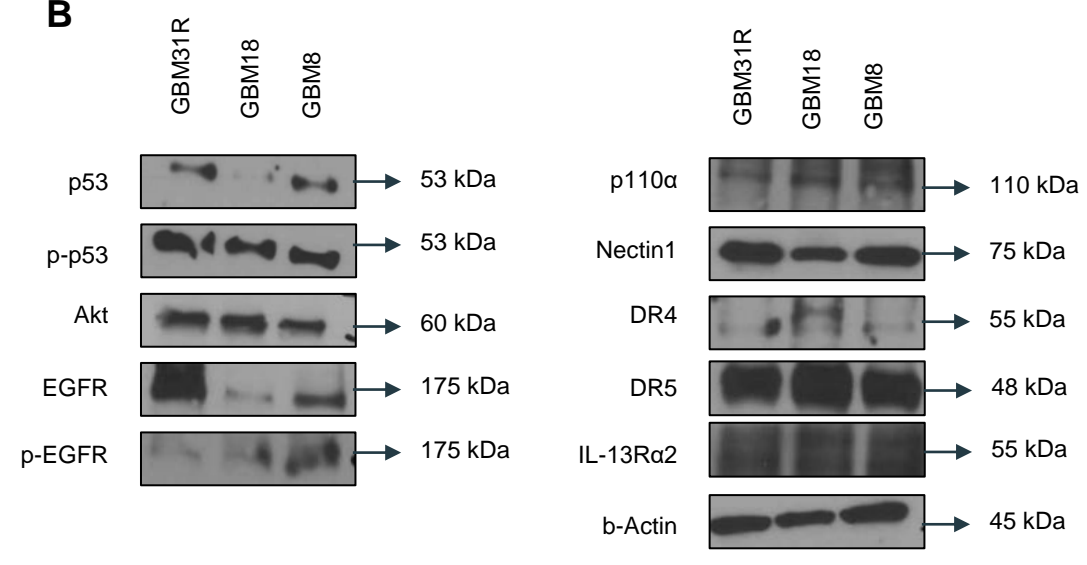

**C**

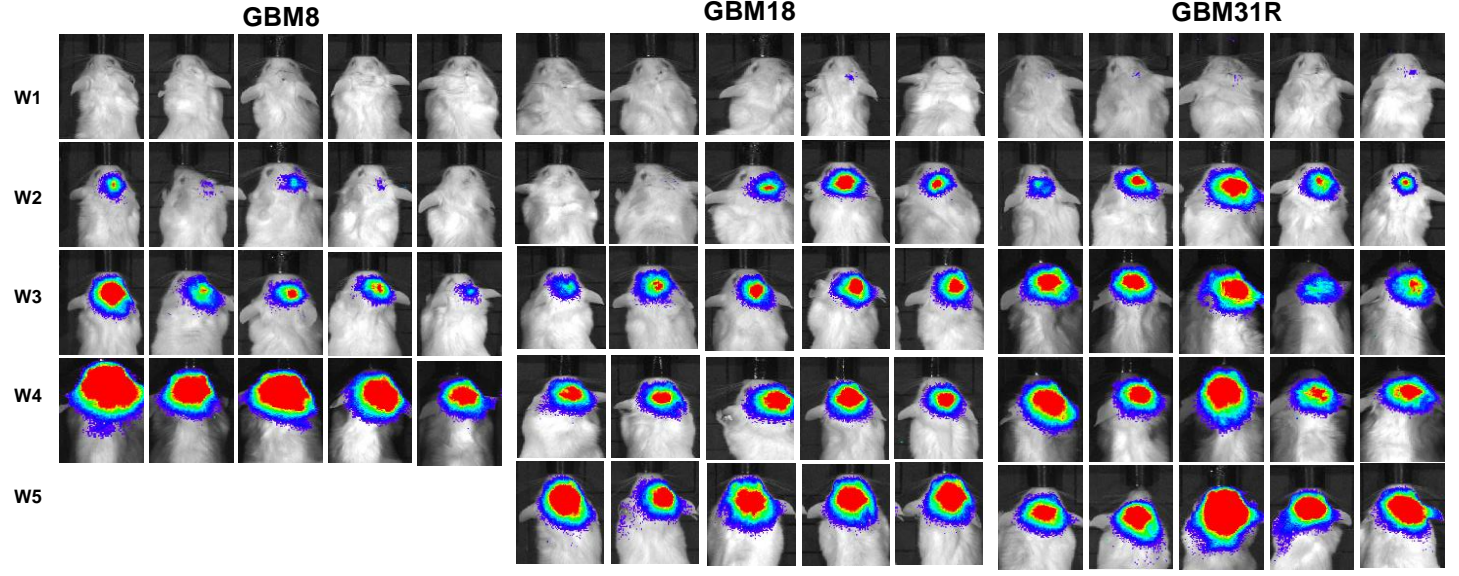

Supplement: DataSheet_1.pdf [file DataSheet_1.pdf]
